# Supplementary material for: Immobilization of Perylenetetracarboxylic Dianhydride on Al2O3 for Efficiently Photocatalytic Sulfide Oxidation
Source: MDPI journal article supplement (doi:10.3390/molecules29091934), 2024-04-24
Supplement: s1 [file s1]

# **Immobilization of Perylenetetracarboxylic Dianhydride on Al<sub>2</sub>O<sub>3</sub> for Efficiently Photocatalytic Sulfide Oxidation**

**Jiahao Liang<sup>1,2</sup>, Jie Wang<sup>1,2,\*</sup>, Hao Hou<sup>1,2</sup>, Qingzhu Xu<sup>1,2</sup>, Wei Liu<sup>1,2</sup>, Chenliang Su<sup>1,2</sup>, and Hongli Sun<sup>1,2,\*</sup>**

<sup>1</sup>International Collaborative Laboratory of 2D Materials for Optoelectronic Science & Technology, Engineering Technology Research Center for 2D Materials Information Functional Devices and Systems of Guangdong Province, Institute of Microscale Optoelectronics, Shenzhen University, Shenzhen 518060, China

<sup>2</sup>State Key Laboratory of Radio Frequency Heterogeneous Integration, Shenzhen University, Shenzhen 518060, China

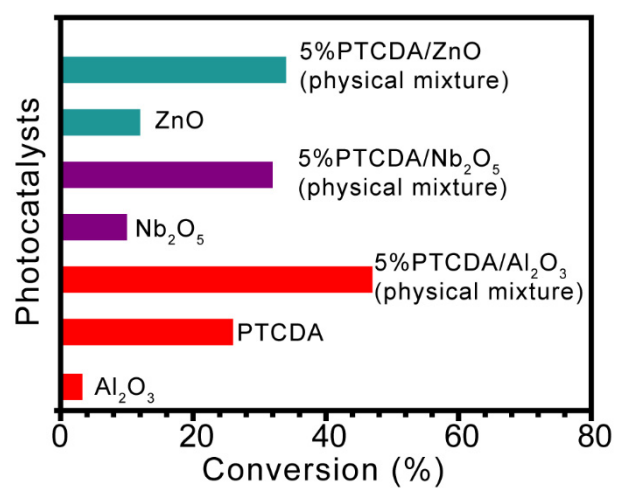

**Figure S1** Comparison of activity of series photocatalysts. Reaction conditions: photocatalyst, 10 mg; methanol, 2 mL; substrate, 0.1 mmol; white LED ( $\geq 420$  nm),  $500 \text{ mW cm}^{-2}$ ;  $\text{O}_2$ , 1 atm.

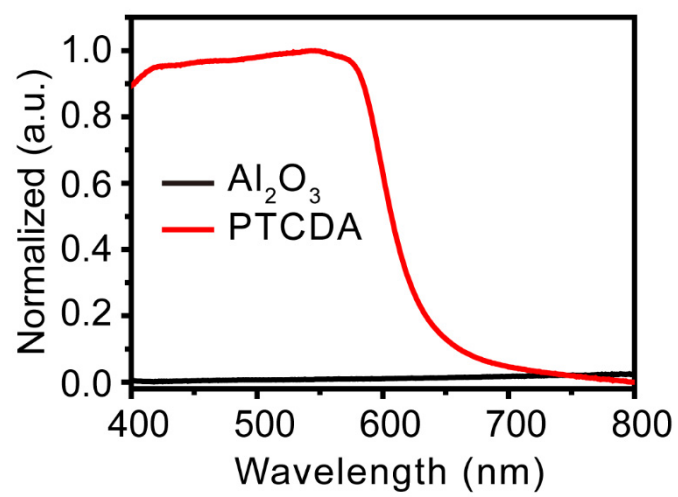

**Figure S2** UV-Vis absorption spectra of PTCDA and  $\text{Al}_2\text{O}_3$ .

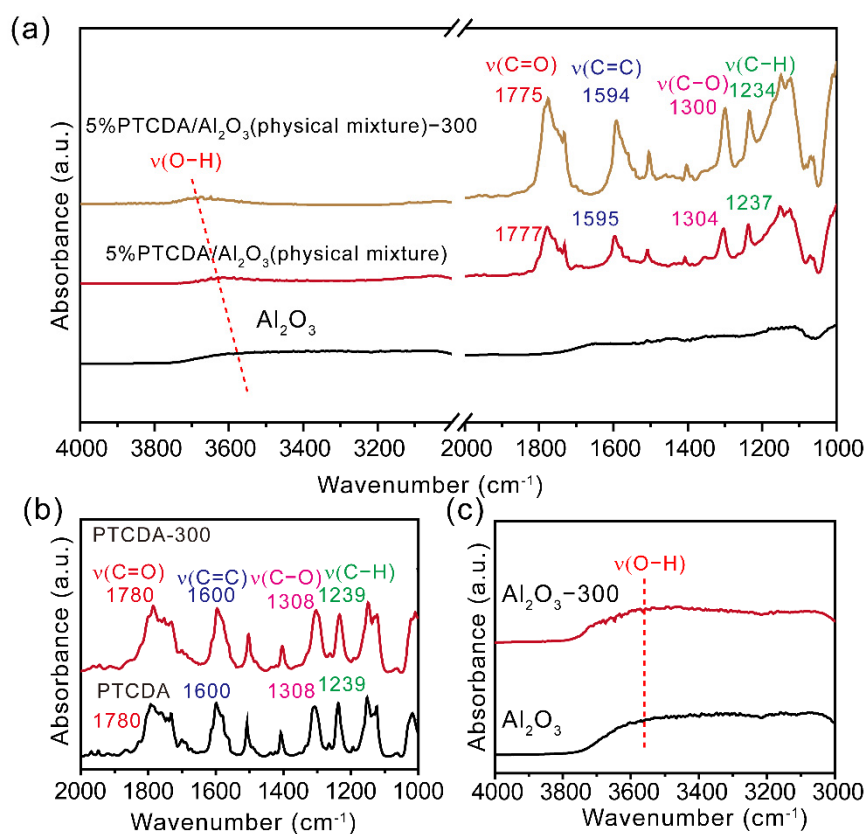

**Figure S3** (a) DRIFTS spectra of Al<sub>2</sub>O<sub>3</sub>, PTCDA/Al<sub>2</sub>O<sub>3</sub>(physical mixture), and PTCDA/Al<sub>2</sub>O<sub>3</sub>(physical mixture)-300. PTCDA/Al<sub>2</sub>O<sub>3</sub>(physical mixture) calcining at 300 °C is symbolized as PTCDA/Al<sub>2</sub>O<sub>3</sub>(physical mixture)-300. (b) DRIFTS spectra of PTCDA and PTCDA calcined at 300 °C (PTCDA-300). (c) DRIFTS spectra of PTCDA and PTCDA calcined at 300 °C (PTCDA-300).

**Table S1.** Control experiments to study photocatalytic sulfide oxidation.

| Entry          | Photocatalysts                                            | Time<br>(h) | Atmosphere     | Conversion (%) |
|----------------|-----------------------------------------------------------|-------------|----------------|----------------|
| 1              | 5%PTCDA/Al <sub>2</sub> O <sub>3</sub> (physical mixture) | 6           | Ar             | 0              |
| 2              | 5%PTCDA/Al <sub>2</sub> O <sub>3</sub> (physical mixture) | 6           | O <sub>2</sub> | 93             |
| 3              | No                                                        | 6           | O <sub>2</sub> | 0              |
| <sup>a</sup> 4 | 5%PTCDA/Al <sub>2</sub> O <sub>3</sub> (physical mixture) | 6           | O <sub>2</sub> | 0              |

Reaction condition: photocatalyst, 10 mg; methanol, 2 mL; 0.1 mmol, thioanisole; white LED ( $\geq 420$  nm), 500 mW cm<sup>-2</sup>; O<sub>2</sub>, 1 atm; time, 6 h. <sup>a</sup>The reaction is conducted in dark.

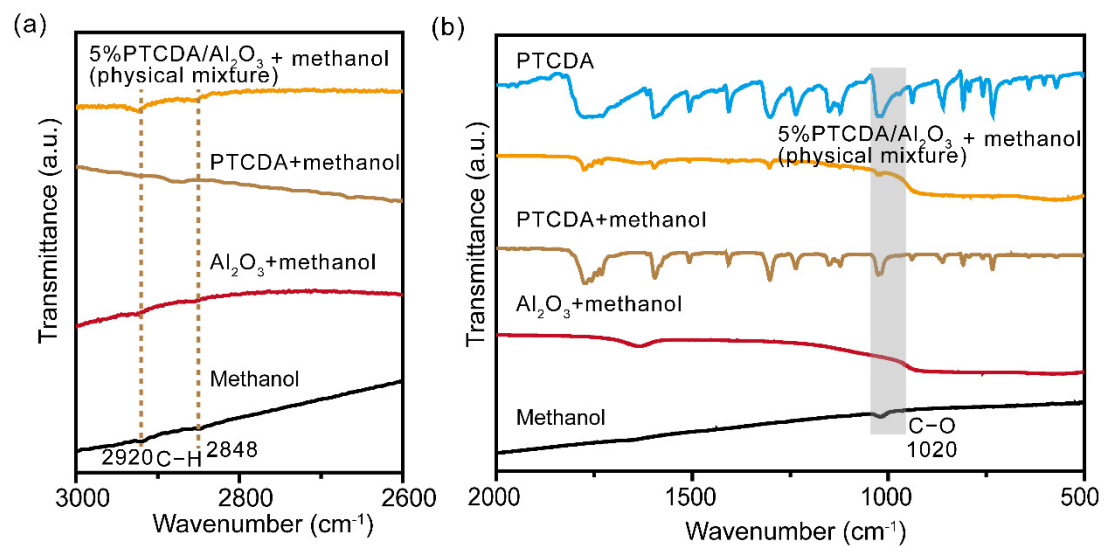

**Figure S4** FTIR spectra of  $\text{Al}_2\text{O}_3$ , PTCDA, and 5%PTCDA/ $\text{Al}_2\text{O}_3$ (physical mixture) adsorbing methanol.

**Table S2.** Control experiments to study photocatalytic sulfide oxidation.

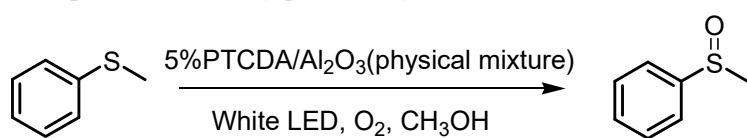

| Entry | Photocatalysts                                            | Time (h) | Conversion (%) | Yield (%) |
|-------|-----------------------------------------------------------|----------|----------------|-----------|
| 1     | 5%PTCDA/Al <sub>2</sub> O <sub>3</sub> (physical mixture) | 9        | 92             | 62        |

Reaction condition: photocatalyst, 50 mg; methanol, 25 mL; 1 g, thioanisole; white LED ( $\geq 420$  nm), 500 mW cm<sup>-2</sup>; O<sub>2</sub>, 1 atm.

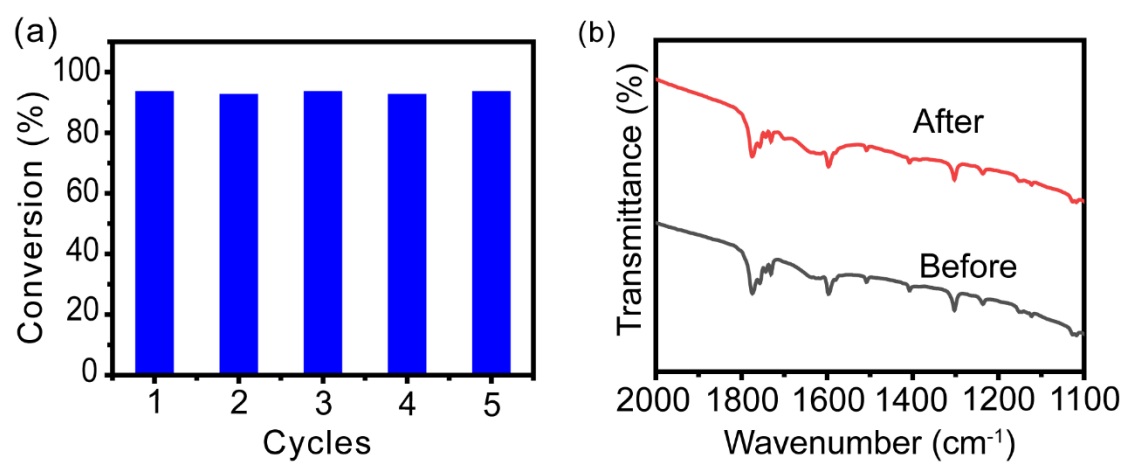

**Figure S5** (a) Evaluation of photocatalytic stability. (b) FTIR spectra of 5%PTCDA/Al<sub>2</sub>O<sub>3</sub>(physical mixture) before and after reaction.
